# Supplementary material for: Agreement and repeatability of vascular reactivity estimates based on a breath-hold task and a resting state scan
Source: PubMed Central journal article supplement (PMC4441043; doi:10.1016/j.neuroimage.2015.03.004), 2015-06
Supplement: mmc1.pdf [file mmc1.pdf]

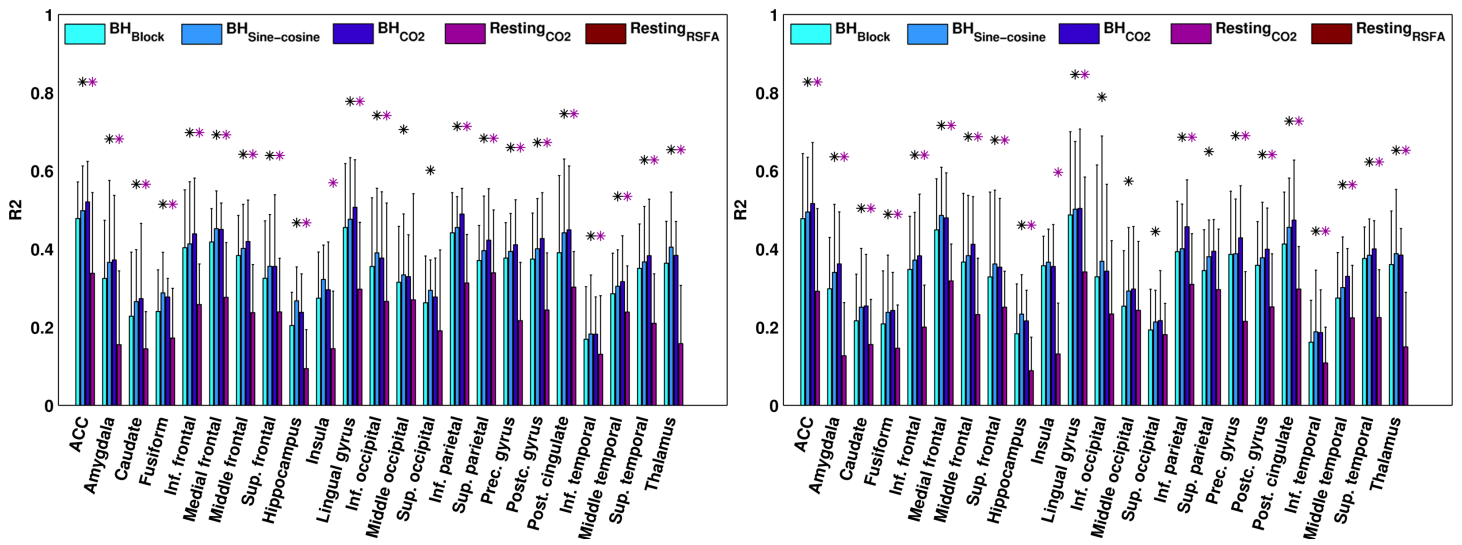

**Figure S.1:** The median amount of variance (error bars: interquartile range) explained by each of the methods in each region of interest in the left hemisphere (left) and right hemisphere (right). A black asterisk indicates a significant difference between the three breath-hold based analyses. A purple asterisk indicates a significant difference between the resting state based analysis and the CO<sub>2</sub> regressor based breath-hold based analysis.

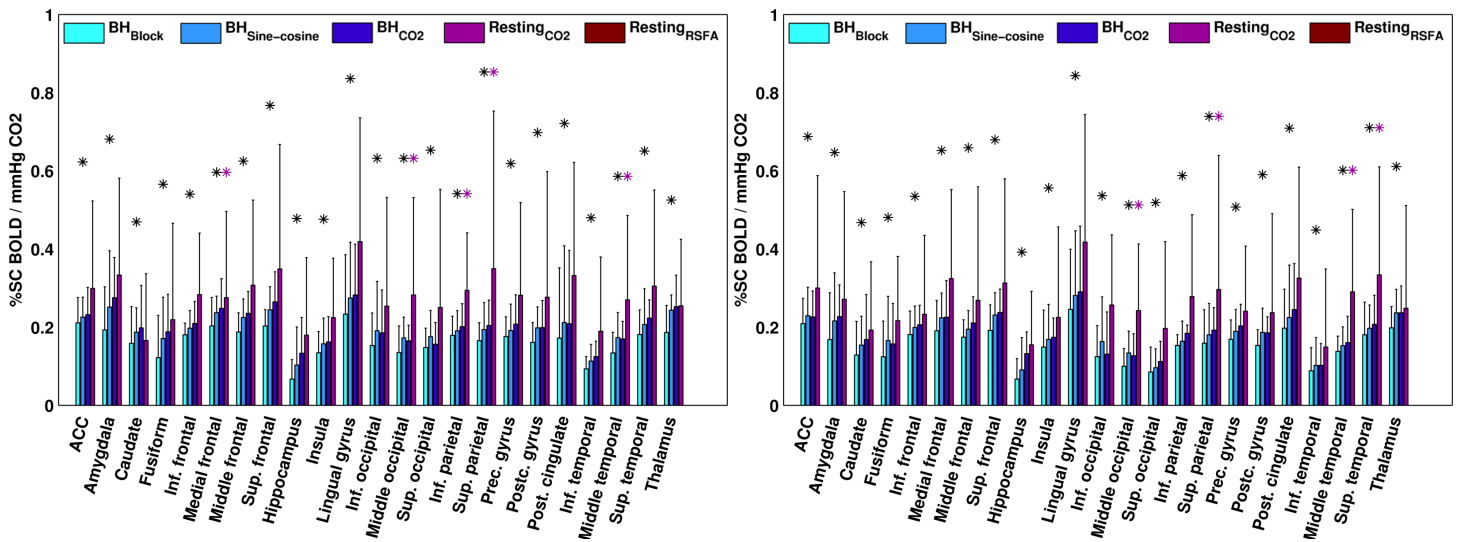

**Figure S.2:** The median estimated vascular reactivity (error bars: interquartile range) explained by each of the methods in each region of interest in the left hemisphere (left) and right hemisphere (right). A black asterisk indicates a significant difference between the three breath-hold based analyses. A purple asterisk indicates a significant difference between the resting state based analysis and the CO<sub>2</sub> regressor based breath-hold based analysis.

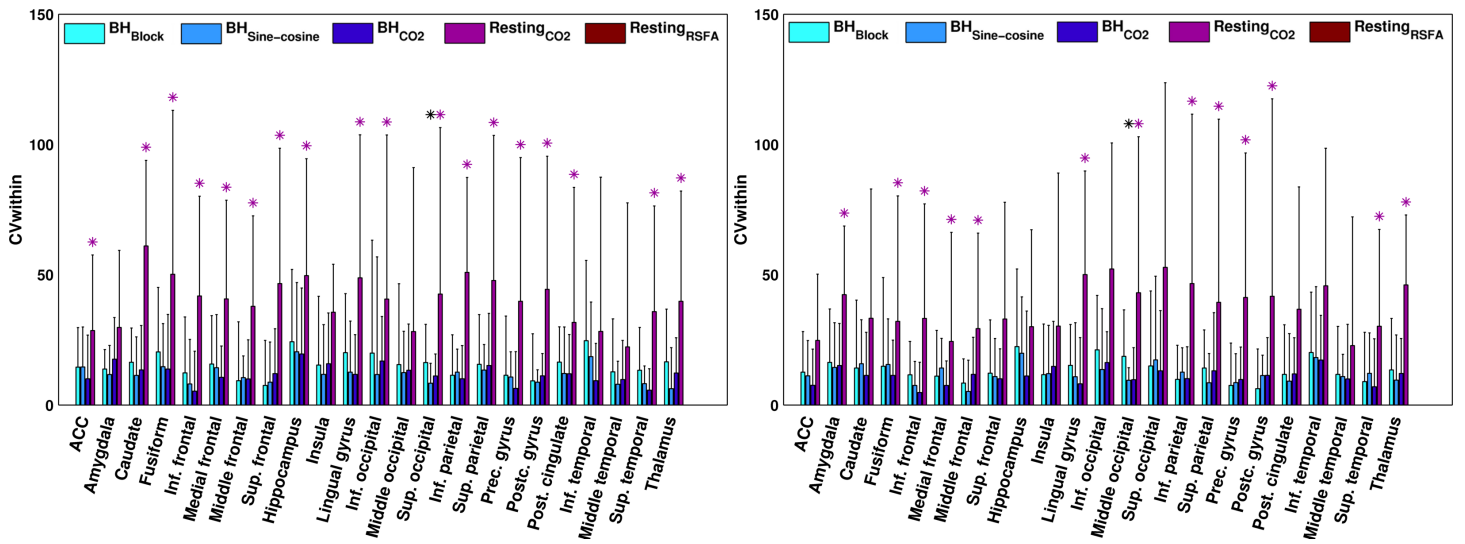

**Figure S.3:** The median estimated CV (error bars: iqr) by each of the methods in each region of interest in the left hemisphere (left) and right hemisphere (right). A black asterisk indicates a significant difference between the three breath-hold based analyses. A purple asterisk indicates a significant difference between the resting state based analysis and the CO<sub>2</sub> regressor based breath-hold based analysis.

**Table S.1:** Between-subject correlation of vascular reactivity values obtained through the  $BH_{CO_2}$  and the  $Resting_{CO_2}$  method, and as a comparison between-subject correlation of vascular reactivity values obtained through the  $BH_{\text{sine-cosine}}$  and the  $BH_{CO_2}$  method.

| Region                    | $BH_{CO_2}$ and $Resting_{CO_2}$ |       | $BH_{\text{sine-cosine}}$ and $BH_{CO_2}$ |       |
|---------------------------|----------------------------------|-------|-------------------------------------------|-------|
|                           | $r$                              | $p$   | $r$                                       | $p$   |
| Left ACC                  | 0.605                            | 0.022 | 0.872                                     | 0.000 |
| Left Amygdala             | 0.739                            | 0.003 | 0.848                                     | 0.000 |
| Left Caudate              | 0.280                            | 0.333 | 0.866                                     | 0.000 |
| Left Fusiform             | 0.655                            | 0.011 | 0.826                                     | 0.000 |
| Left inferior frontal     | 0.427                            | 0.128 | 0.789                                     | 0.001 |
| Left medial frontal       | 0.597                            | 0.024 | 0.849                                     | 0.000 |
| Left middle frontal       | 0.480                            | 0.082 | 0.753                                     | 0.002 |
| Left superior frontal     | 0.572                            | 0.033 | 0.859                                     | 0.000 |
| Left Hippocampus          | 0.632                            | 0.015 | 0.808                                     | 0.000 |
| Left Insula               | 0.347                            | 0.225 | 0.826                                     | 0.000 |
| Left lingual gyrus        | 0.468                            | 0.092 | 0.887                                     | 0.000 |
| Left inferior occipital   | 0.594                            | 0.025 | 0.966                                     | 0.000 |
| Left middle occipital     | 0.436                            | 0.119 | 0.821                                     | 0.000 |
| Left superior occipital   | 0.024                            | 0.934 | 0.689                                     | 0.006 |
| Left inferior parietal    | 0.262                            | 0.365 | 0.797                                     | 0.001 |
| Left superior parietal    | 0.469                            | 0.090 | 0.894                                     | 0.000 |
| Left precentral gyrus     | 0.361                            | 0.205 | 0.827                                     | 0.000 |
| Left postcentral gyrus    | 0.521                            | 0.056 | 0.833                                     | 0.000 |
| Left posterior cingulate  | 0.593                            | 0.025 | 0.927                                     | 0.000 |
| Left inferior temporal    | 0.565                            | 0.035 | 0.917                                     | 0.000 |
| Left middle temporal      | 0.540                            | 0.046 | 0.795                                     | 0.001 |
| Left superior temporal    | 0.572                            | 0.033 | 0.803                                     | 0.001 |
| Left Thalamus             | 0.539                            | 0.047 | 0.917                                     | 0.000 |
| Right ACC                 | 0.379                            | 0.181 | 0.910                                     | 0.000 |
| Right Amygdala            | 0.401                            | 0.156 | 0.888                                     | 0.000 |
| Right Caudate             | 0.466                            | 0.093 | 0.870                                     | 0.000 |
| Right Fusiform            | 0.567                            | 0.034 | 0.876                                     | 0.000 |
| Right inferior frontal    | 0.521                            | 0.056 | 0.778                                     | 0.001 |
| Right medial frontal      | 0.519                            | 0.057 | 0.833                                     | 0.000 |
| Right middle frontal      | 0.411                            | 0.144 | 0.744                                     | 0.002 |
| Right superior frontal    | 0.711                            | 0.004 | 0.812                                     | 0.000 |
| Right Hippocampus         | 0.553                            | 0.040 | 0.609                                     | 0.021 |
| Right Insula              | 0.278                            | 0.336 | 0.911                                     | 0.000 |
| Right lingual gyrus       | 0.628                            | 0.016 | 0.943                                     | 0.000 |
| Right inferior occipital  | 0.374                            | 0.187 | 0.946                                     | 0.000 |
| Right middle occipital    | 0.270                            | 0.351 | 0.811                                     | 0.000 |
| Right superior occipital  | 0.320                            | 0.265 | 0.943                                     | 0.000 |
| Right inferior parietal   | 0.400                            | 0.157 | 0.859                                     | 0.000 |
| Right superior parietal   | 0.407                            | 0.149 | 0.848                                     | 0.000 |
| Right precentral gyrus    | 0.163                            | 0.579 | 0.838                                     | 0.000 |
| Right postcentral gyrus   | 0.276                            | 0.340 | 0.899                                     | 0.000 |
| Right posterior cingulate | 0.426                            | 0.128 | 0.891                                     | 0.000 |
| Right inferior temporal   | 0.620                            | 0.018 | 0.903                                     | 0.000 |
| Right middle temporal     | 0.441                            | 0.114 | 0.830                                     | 0.000 |
| Right superior temporal   | 0.452                            | 0.105 | 0.852                                     | 0.000 |
| Right Thalamus            | 0.313                            | 0.276 | 0.935                                     | 0.000 |

**Table S.2:**  $CV_{\text{between}}$  for ROIs and the four analysis methods.

| Region                    | $BH_{\text{Block}}$ | $BH_{\text{Sine-cosine}}$ | $BH_{\text{CO}_2}$ | $Resting_{\text{CO}_2}$ |
|---------------------------|---------------------|---------------------------|--------------------|-------------------------|
| Left ACC                  | 31.97               | 27.13                     | 25.62              | 59.61                   |
| Left Amygdala             | 44.05               | 35.33                     | 30.58              | 71.24                   |
| Left Caudate              | 45.64               | 40.70                     | 43.45              | 81.98                   |
| Left Fusiform             | 53.92               | 48.52                     | 38.07              | 73.12                   |
| Left inferior frontal     | 30.30               | 24.14                     | 23.59              | 60.73                   |
| Left medial frontal       | 33.63               | 27.39                     | 25.00              | 61.43                   |
| Left middle frontal       | 28.90               | 24.33                     | 23.85              | 55.32                   |
| Left superior frontal     | 31.66               | 26.82                     | 27.23              | 60.64                   |
| Left Hippocampus          | 63.92               | 55.73                     | 46.23              | 68.85                   |
| Left Insula               | 39.57               | 32.65                     | 34.83              | 60.15                   |
| Left lingual gyrus        | 37.05               | 30.28                     | 27.43              | 81.24                   |
| Left inferior occipital   | 65.21               | 58.45                     | 53.86              | 84.28                   |
| Left middle occipital     | 41.07               | 33.31                     | 26.36              | 75.37                   |
| Left superior occipital   | 27.85               | 28.06                     | 23.51              | 76.11                   |
| Left inferior parietal    | 24.53               | 20.43                     | 20.36              | 61.70                   |
| Left superior parietal    | 36.44               | 32.42                     | 30.44              | 69.73                   |
| Left precentral gyrus     | 29.96               | 27.27                     | 24.05              | 65.33                   |
| Left postcentral gyrus    | 26.65               | 23.69                     | 22.07              | 66.50                   |
| Left posterior cingulate  | 48.32               | 40.88                     | 41.45              | 69.82                   |
| Left inferior temporal    | 58.18               | 55.66                     | 47.80              | 71.33                   |
| Left middle temporal      | 35.24               | 29.28                     | 27.09              | 58.69                   |
| Left superior temporal    | 33.04               | 26.31                     | 24.83              | 58.45                   |
| Left Thalamus             | 35.81               | 32.00                     | 29.61              | 62.20                   |
| Right ACC                 | 32.17               | 27.70                     | 25.85              | 60.42                   |
| Right Amygdala            | 40.83               | 37.09                     | 37.54              | 71.86                   |
| Right Caudate             | 42.10               | 36.76                     | 37.21              | 67.16                   |
| Right Fusiform            | 53.65               | 49.87                     | 38.46              | 81.51                   |
| Right inferior frontal    | 27.99               | 22.92                     | 23.37              | 67.17                   |
| Right medial frontal      | 32.49               | 27.13                     | 26.69              | 61.86                   |
| Right middle frontal      | 27.03               | 21.55                     | 24.61              | 63.50                   |
| Right superior frontal    | 25.42               | 20.17                     | 24.00              | 61.93                   |
| Right Hippocampus         | 53.99               | 47.94                     | 40.58              | 65.13                   |
| Right Insula              | 27.64               | 26.33                     | 28.66              | 65.93                   |
| Right lingual gyrus       | 44.72               | 37.43                     | 36.32              | 82.30                   |
| Right inferior occipital  | 60.26               | 53.74                     | 47.00              | 79.08                   |
| Right middle occipital    | 45.76               | 39.24                     | 34.95              | 79.45                   |
| Right superior occipital  | 49.97               | 53.11                     | 48.73              | 82.29                   |
| Right inferior parietal   | 26.11               | 21.17                     | 23.41              | 67.16                   |
| Right superior parietal   | 29.49               | 24.59                     | 29.90              | 75.32                   |
| Right precentral gyrus    | 26.14               | 24.03                     | 24.44              | 73.93                   |
| Right postcentral gyrus   | 31.39               | 28.27                     | 29.33              | 71.56                   |
| Right posterior cingulate | 39.41               | 33.41                     | 32.57              | 65.09                   |
| Right inferior temporal   | 64.01               | 55.65                     | 54.61              | 86.57                   |
| Right middle temporal     | 30.42               | 25.44                     | 26.79              | 60.46                   |
| Right superior temporal   | 29.67               | 24.28                     | 24.50              | 60.11                   |
| Right Thalamus            | 38.67               | 33.54                     | 35.00              | 60.41                   |

**Table S.3:**  $CV_{\text{within}}$  for ROIs.  $p$  values refer to Friedman tests significance levels. BH comp.: comparison between BH based methods ( $BH_{\text{Block}}$ ,  $BH_{\text{Sine-cosine}}$ ,  $BH_{\text{CO}_2}$ ),  $\text{CO}_2$  comp.: comparison between  $\text{CO}_2$  based methods ( $BH_{\text{CO}_2}$ ,  $\text{RestingCO}_2$ ).

| Region                    | $BH_{\text{Block}}$ | $BH_{\text{Sine-cosine}}$ | $BH_{\text{CO}_2}$ | $\text{RestingCO}_2$ | $p$ (BH comp.) | $p$ ( $\text{CO}_2$ comp.) |
|---------------------------|---------------------|---------------------------|--------------------|----------------------|----------------|----------------------------|
| Left ACC                  | 14.51(15.20)        | 14.58(15.37)              | 10.01(16.82)       | 28.56(28.98)         | 0.223          | 0.001                      |
| Left Amygdala             | 13.81(7.46)         | 11.68(11.18)              | 17.58(15.97)       | 29.76(29.56)         | 0.257          | 0.285                      |
| Left Caudate              | 16.40(13.10)        | 11.36(14.76)              | 13.47(17.04)       | 60.99(32.91)         | 0.607          | 0.008                      |
| Left Fusiform             | 20.39(24.73)        | 14.68(16.53)              | 13.76(21.01)       | 50.17(62.91)         | 0.751          | 0.033                      |
| Left inferior frontal     | 12.32(21.45)        | 8.04(17.10)               | 5.26(15.38)        | 41.83(38.29)         | 0.135          | 0.008                      |
| Left medial frontal       | 15.68(18.60)        | 14.28(20.37)              | 10.60(12.01)       | 40.69(37.89)         | 0.257          | 0.001                      |
| Left middle frontal       | 9.30(22.59)         | 10.51(8.32)               | 9.97(15.04)        | 37.86(34.69)         | 0.807          | 0.008                      |
| Left superior frontal     | 7.44(17.36)         | 8.76(15.37)               | 12.02(17.25)       | 46.58(51.98)         | 0.071          | 0.033                      |
| Left Hippocampus          | 24.27(27.77)        | 20.43(26.54)              | 19.56(25.35)       | 49.62(44.89)         | 0.931          | 0.008                      |
| Left Insula               | 15.34(26.37)        | 11.69(19.13)              | 15.81(19.50)       | 35.59(18.41)         | 0.257          | 0.285                      |
| Left lingual gyrus        | 20.07(22.66)        | 12.55(19.66)              | 11.79(15.16)       | 48.77(54.95)         | 0.168          | 0.001                      |
| Left inferior occipital   | 19.87(43.38)        | 11.68(45.20)              | 16.85(17.11)       | 40.66(62.99)         | 0.168          | 0.033                      |
| Left middle occipital     | 15.50(31.03)        | 12.43(15.84)              | 13.33(17.74)       | 28.19(62.92)         | 0.395          | 0.109                      |
| Left superior occipital   | 16.29(14.67)        | 8.37(7.58)                | 11.12(8.45)        | 42.56(63.93)         | 0.024          | 0.008                      |
| Left inferior parietal    | 11.40(15.48)        | 12.64(8.79)               | 10.09(12.65)       | 50.91(36.41)         | 0.751          | 0.008                      |
| Left superior parietal    | 15.60(19.06)        | 13.36(9.81)               | 15.19(19.97)       | 47.79(55.67)         | 0.257          | 0.008                      |
| Left precentral gyrus     | 11.41(22.72)        | 10.70(9.74)               | 6.35(14.12)        | 39.83(55.09)         | 0.931          | 0.001                      |
| Left postcentral gyrus    | 9.26(18.04)         | 8.75(4.76)                | 11.20(8.56)        | 44.40(51.10)         | 0.807          | 0.033                      |
| Left posterior cingulate  | 16.46(13.52)        | 12.07(17.88)              | 11.99(15.06)       | 31.66(51.84)         | 0.807          | 0.033                      |
| Left inferior temporal    | 24.65(30.83)        | 18.56(20.95)              | 9.34(14.26)        | 28.26(59.19)         | 0.424          | 0.285                      |
| Left middle temporal      | 12.72(20.33)        | 7.93(8.80)                | 9.77(15.01)        | 22.29(55.27)         | 0.395          | 0.109                      |
| Left superior temporal    | 13.32(16.44)        | 8.16(6.79)                | 5.65(8.22)         | 35.83(40.56)         | 0.607          | 0.008                      |
| Left Thalamus             | 16.56(20.24)        | 6.25(15.76)               | 12.24(13.54)       | 39.82(42.29)         | 0.135          | 0.033                      |
| Right ACC                 | 12.58(15.61)        | 11.19(13.56)              | 7.55(13.88)        | 24.78(25.44)         | 1.000          | 0.109                      |
| Right Amygdala            | 16.35(20.49)        | 14.40(17.16)              | 15.17(16.07)       | 42.39(26.24)         | 0.931          | 0.008                      |
| Right Caudate             | 14.15(26.11)        | 15.79(16.88)              | 11.35(16.58)       | 33.28(49.59)         | 0.807          | 0.285                      |
| Right Fusiform            | 14.86(34.02)        | 15.51(17.53)              | 11.35(13.51)       | 32.04(48.22)         | 0.395          | 0.033                      |
| Right inferior frontal    | 11.57(12.80)        | 7.51(9.20)                | 4.76(11.63)        | 33.21(43.92)         | 0.257          | 0.033                      |
| Right medial frontal      | 11.06(17.54)        | 14.13(11.46)              | 7.47(9.43)         | 24.36(41.88)         | 0.607          | 0.033                      |
| Right middle frontal      | 8.43(9.26)          | 5.20(12.01)               | 11.71(14.23)       | 29.32(36.61)         | 0.395          | 0.008                      |
| Right superior frontal    | 12.19(20.44)        | 10.85(14.66)              | 10.06(11.49)       | 32.97(44.80)         | 0.395          | 0.109                      |
| Right Hippocampus         | 22.37(29.83)        | 19.85(21.68)              | 11.15(24.91)       | 30.04(37.20)         | 0.807          | 0.109                      |
| Right Insula              | 11.63(19.41)        | 12.04(18.53)              | 14.81(17.27)       | 30.24(58.73)         | 0.257          | 0.109                      |
| Right lingual gyrus       | 15.24(15.64)        | 10.84(20.76)              | 8.12(17.73)        | 50.05(39.73)         | 0.145          | 0.000                      |
| Right inferior occipital  | 21.15(20.91)        | 13.63(23.31)              | 16.28(11.83)       | 52.21(48.37)         | 0.089          | 0.109                      |
| Right middle occipital    | 18.66(17.84)        | 9.48(4.81)                | 9.68(12.35)        | 43.06(59.89)         | 0.010          | 0.033                      |
| Right superior occipital  | 14.95(28.77)        | 17.29(32.11)              | 13.12(23.10)       | 52.81(70.85)         | 0.931          | 0.109                      |
| Right inferior parietal   | 9.81(13.13)         | 12.62(9.35)               | 10.13(12.19)       | 46.60(65.02)         | 0.807          | 0.008                      |
| Right superior parietal   | 14.14(14.66)        | 8.51(11.21)               | 13.07(22.32)       | 39.39(70.31)         | 0.109          | 0.008                      |
| Right precentral gyrus    | 7.53(16.23)         | 8.59(11.10)               | 9.73(12.52)        | 41.26(55.51)         | 0.395          | 0.033                      |
| Right postcentral gyrus   | 6.27(15.20)         | 11.30(7.82)               | 11.36(14.47)       | 41.72(75.80)         | 0.424          | 0.033                      |
| Right posterior cingulate | 11.72(19.08)        | 9.13(18.24)               | 11.94(13.86)       | 36.75(46.94)         | 0.607          | 0.285                      |
| Right inferior temporal   | 20.11(23.22)        | 18.20(27.19)              | 17.26(17.16)       | 45.71(52.84)         | 0.931          | 0.285                      |
| Right middle temporal     | 11.69(18.46)        | 10.86(8.58)               | 9.98(20.96)        | 22.79(49.45)         | 0.257          | 0.109                      |
| Right superior temporal   | 8.94(18.97)         | 12.12(15.51)              | 6.97(18.42)        | 30.22(37.19)         | 0.395          | 0.001                      |
| Right Thalamus            | 13.42(19.79)        | 9.54(17.29)               | 12.08(13.46)       | 46.10(26.81)         | 0.135          | 0.008                      |

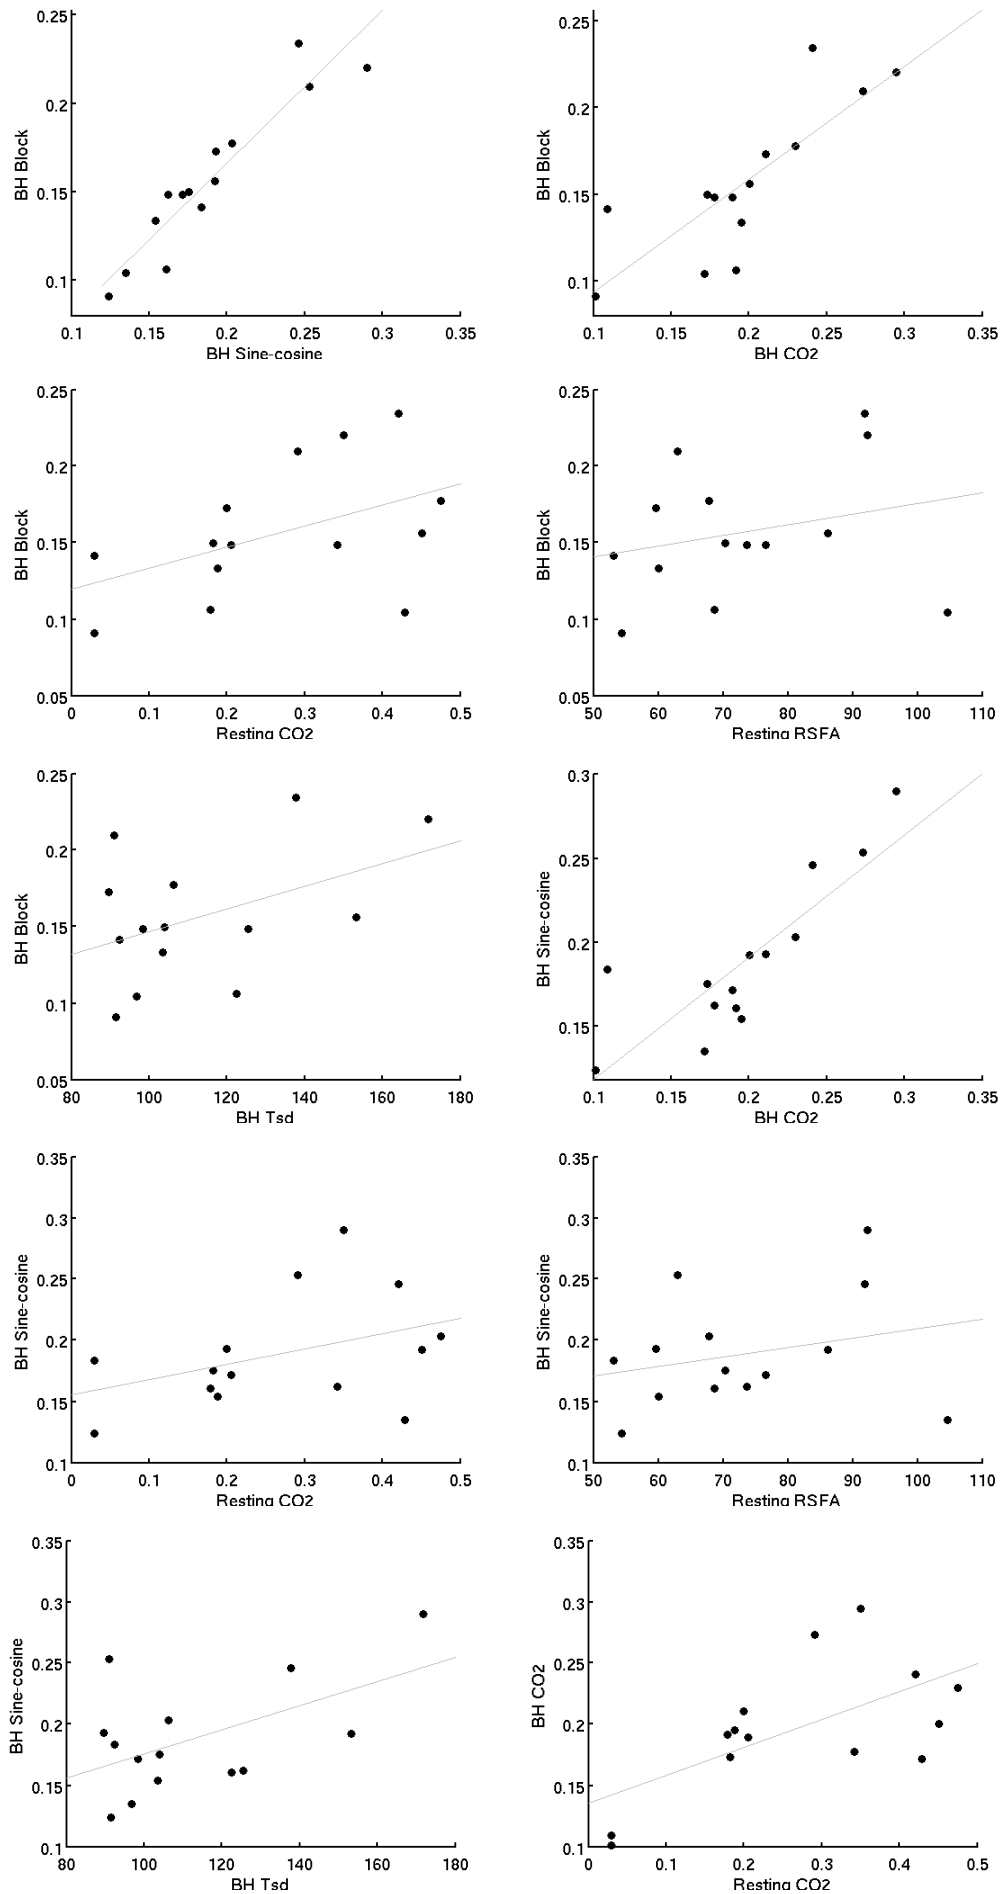

**Figure S.4:** Scatter plots for between-subject correlations of vascular reactivity estimates (averaged over gray matter) obtained by the six different methods  $BH_{Block}$ ,  $BH_{Sine-Cosine}$ ,  $BH_{CO2}$ ,  $Resting_{CO2}$ ,  $Resting_{RSFA}$  and  $BH_{Tsd}$ .

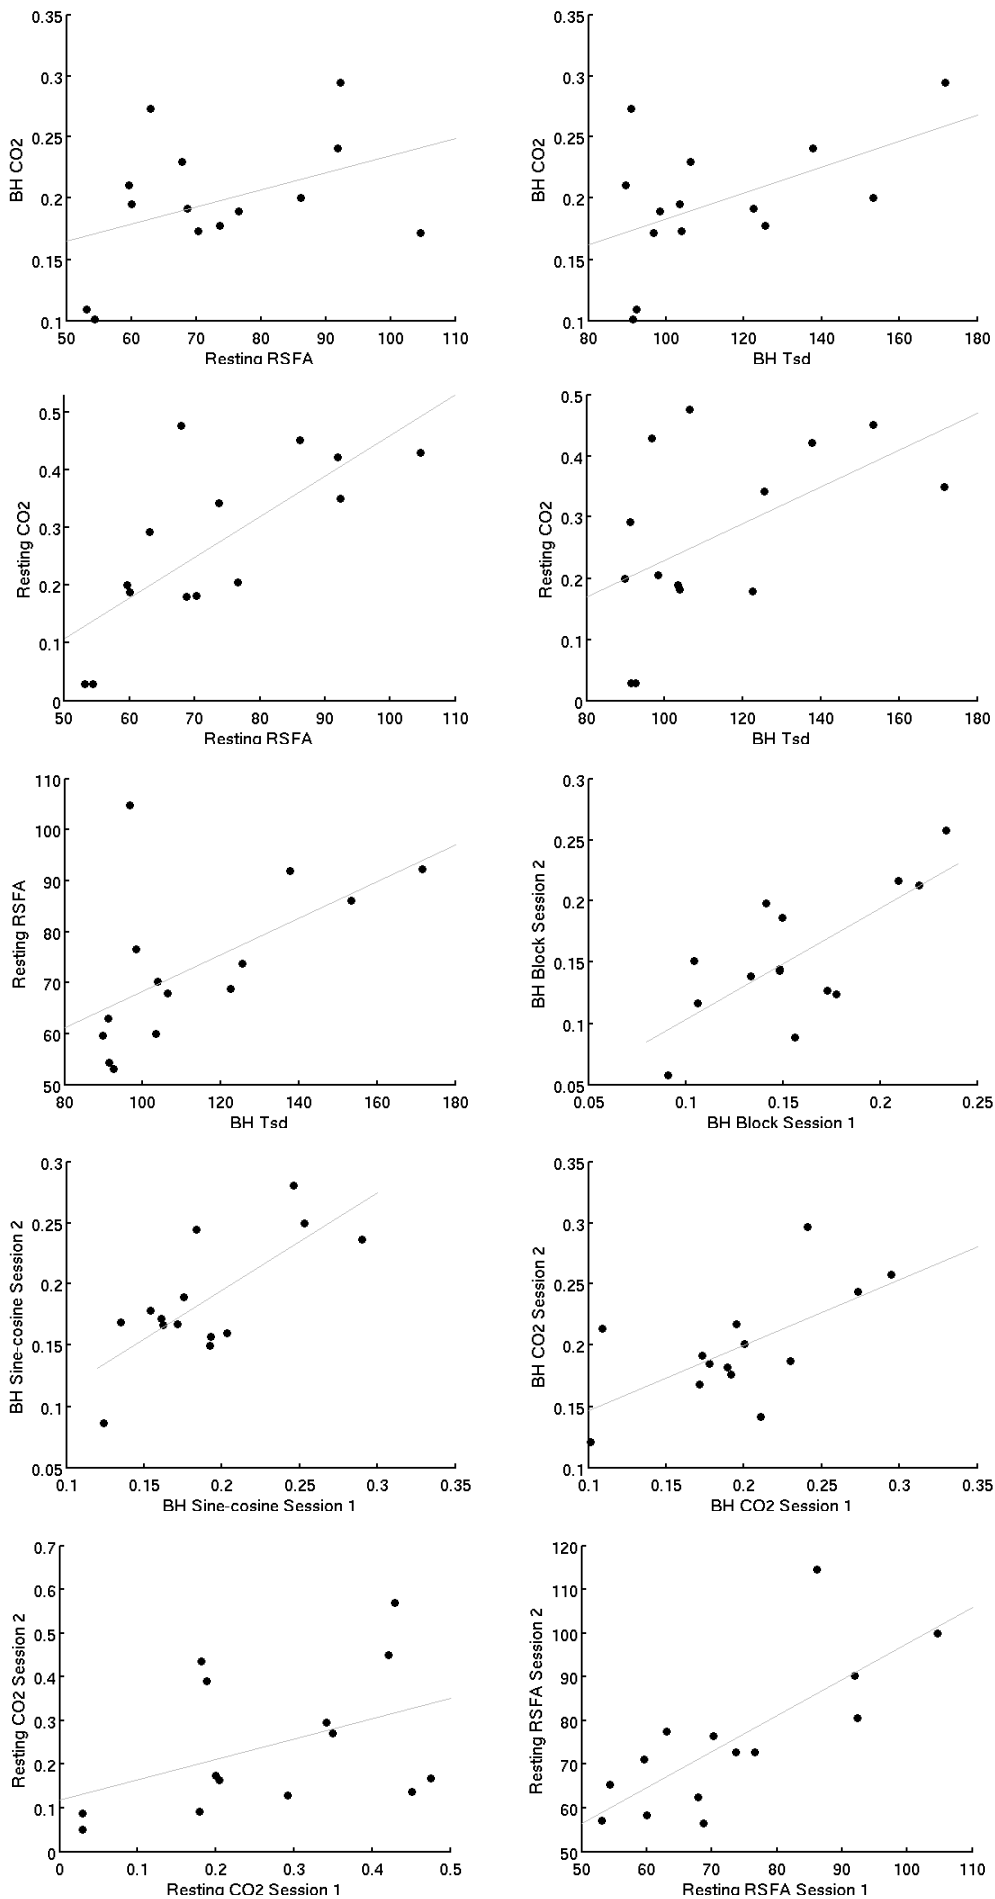

**Figure S.5:** Scatter plots for retest correlations of vascular reactivity estimates (averaged over gray matter) obtained by the six different methods  $BH_{Block}$ ,  $BH_{Sine-Cosine}$ ,  $BH_{CO_2}$ ,  $Resting_{CO_2}$ ,  $Resting_{RSFA}$  and  $BH_{Tsd}$ .

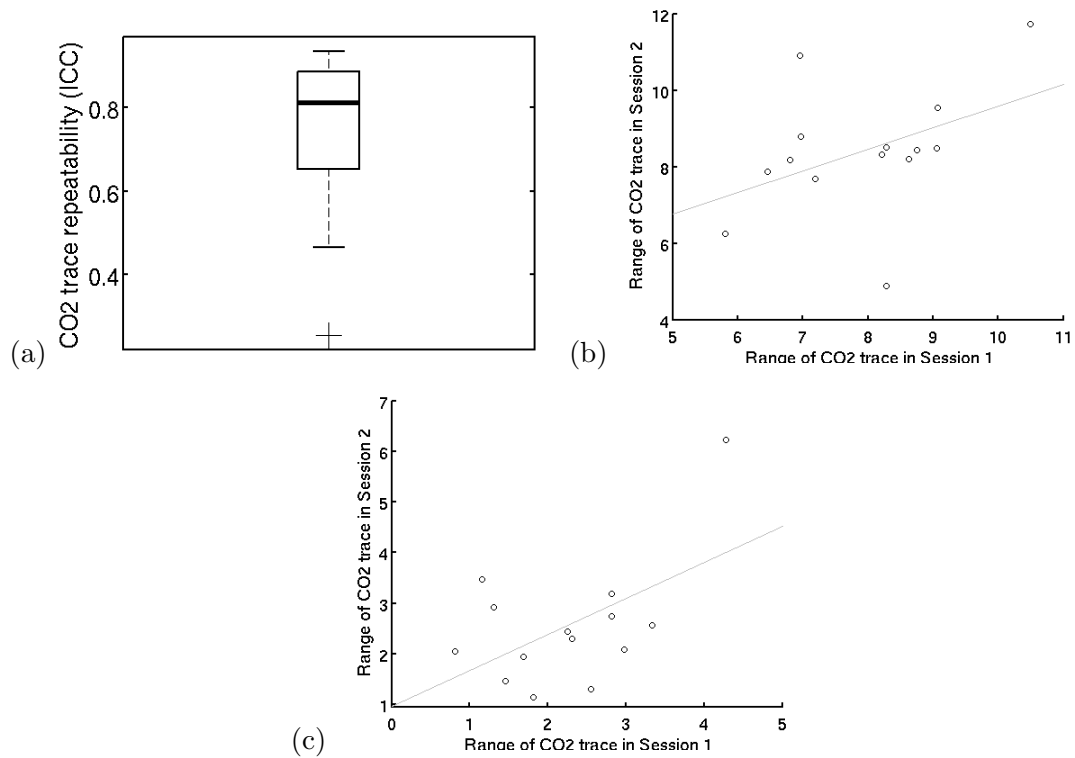

**Figure S.6:** a) Repeatability of the CO<sub>2</sub> trace during the breath-hold task. b) Scatterplot of the CO<sub>2</sub> range obtained during the breath-hold task in session 1 vs. in session 2. 3) Scatterplot of the CO<sub>2</sub> range obtained during the resting scan in session 1 vs. in session 2.
